# Supplementary material for: Risks and Benefits of Judo Training for Middle-Aged and Older People: A Systematic Review
Source: MDPI journal article supplement (doi:10.3390/sports11030068), 2023-03-14
Supplement: s1 [file s1]

**Supplementary Materials**<sup>1</sup>. Study quality and risk of bias (Code refers to full reference available in Table 1).

| Code | A        | B   | C   | D        | E   | F        | G        | Low | Moderate | Serious | Critical | NI | Rating*  |
|------|----------|-----|-----|----------|-----|----------|----------|-----|----------|---------|----------|----|----------|
| 35   | Serious  | Low | Low | Low      | NI  | Moderate | Moderate | 3   | 2        | 1       | 0        | 1  | Serious  |
| 36   | Serious  | Low | Low | Low      | NI  | Moderate | Moderate | 3   | 2        | 1       | 0        | 1  | Serious  |
| 37   | Serious  | Low | Low | Low      | NI  | Moderate | Moderate | 3   | 2        | 1       | 0        | 1  | Serious  |
| 38   | Moderate | Low | Low | Low      | Low | Moderate | Moderate | 3   | 2        | 1       | 0        | 0  | Moderate |
| 39   | Serious  | Low | Low | Moderate | NI  | Moderate | Moderate | 2   | 3        | 1       | 0        | 1  | Serious  |
| 40   | Serious  | Low | Low | Low      | NI  | Moderate | Moderate | 3   | 2        | 1       | 0        | 1  | Serious  |
| 41   | Moderate | Low | Low | Low      | Low | Moderate | Moderate | 4   | 3        | 0       | 0        | 0  | Moderate |
| 42   | Moderate | Low | Low | Low      | Low | Moderate | Moderate | 4   | 3        | 0       | 0        | 0  | Moderate |
| 43   | Moderate | Low | Low | Low      | NI  | Moderate | Moderate | 3   | 3        | 0       | 0        | 1  | Serious  |
| 44   | Serious  | Low | Low | Low      | Low | Low      | Moderate | 4   | 1        | 1       | 0        | 0  | Serious  |

Note: ROBINS-I tool (Sterne et al., 2016) checklist items for *non-randomised controlled studies* related to bias in the following domains: **A**. Confounders; **B**. Participants selection; **C**. Classification of interventions; **D**. Deviations from intervention; **E**. Missing data; **F**. Outcomes measurement; **G**. Results selection. NI=No information.

\* Rating: Declaring a study to be at a particular level of risk of bias for an individual domain will mean that the study as a whole has a risk of bias at least this severe.

| Code | A   | B   | C   | D   | E  | F  | G   | H   | I   | J  | K   | L  | M  | N   | YES | NO | CD | NA | Rating# |
|------|-----|-----|-----|-----|----|----|-----|-----|-----|----|-----|----|----|-----|-----|----|----|----|---------|
| 45   | Yes | Yes | No  | Yes | No | No | Yes | Yes | Yes | No | No  | No | NA | No  | 6   | 7  | 0  | 1  | Fair    |
| 46   | Yes | Yes | Yes | No  | No | No | Yes | Yes | Yes | No | Yes | No | NA | No  | 7   | 6  | 0  | 1  | Fair    |
| 47   | Yes | Yes | No  | NA  | No | No | Yes | Yes | Yes | No | Yes | No | NA | No  | 6   | 6  | 0  | 2  | Fair    |
| 48   | Yes | Yes | Yes | No  | No | No | Yes | Yes | Yes | No | Yes | No | NA | No  | 7   | 6  | 0  | 1  | Fair    |
| 49   | Yes | Yes | Yes | No  | No | No | Yes | Yes | Yes | No | Yes | No | NA | No  | 7   | 6  | 0  | 1  | Fair    |
| 50   | Yes | Yes | Yes | No  | No | No | Yes | Yes | Yes | No | Yes | No | NA | Yes | 8   | 5  | 0  | 1  | Fair    |
| 51   | Yes | Yes | Yes | CD  | No | No | CD  | Yes | Yes | No | Yes | No | NA | No  | 6   | 5  | 2  | 1  | Fair    |

Note: NIH tool (<https://www.nhlbi.nih.gov/health-topics>) checklist items for *cross-sectional studies* related to quality in: **A**. Research question; **B** and **C**. Study population; **D**. Eligibility criteria; **E**. Sample size justification; **F**. Exposure assessment time; **G**. Sufficient timeframe to see an effect; **H**. Levels of exposure; **I**. Exposure measures; **J**. Repeated exposure assessment; **K**. Outcome measures; **L**. Blinding of outcome assessors; **M**. Follow-up rate; and **N**. Statistical analyses. CD=Cannot determine; NA=Not Applicable.

# Rating: Good = 10–14 yes, Fair = 5–9 yes, or Poor = 0–4 yes.

| Code | A   | B   | C-D | E   | F   | G   | H   | I   | J-K-L | M   | N  | O   | P   | Q   | R   | S  | T   | U   | V   | W   | YES | NO | CD | Rating <sup>§</sup> |
|------|-----|-----|-----|-----|-----|-----|-----|-----|-------|-----|----|-----|-----|-----|-----|----|-----|-----|-----|-----|-----|----|----|---------------------|
| 52   | Yes | Yes | Yes | No  | Yes | Yes | No  | No  | Yes   | Yes | No | Yes | Yes | Yes | Yes | No | No  | No  | Yes | Yes | 16  | 7  | 0  | Fair                |
| 53   | Yes | Yes | Yes | No  | No  | No  | No  | Yes | Yes   | Yes | No | Yes | Yes | Yes | Yes | No | No  | Yes | CD  | CD  | 14  | 7  | 2  | Fair                |
| 54   | Yes | Yes | Yes | No  | Yes | Yes | No  | No  | Yes   | CD  | No | Yes | Yes | Yes | No  | No | No  | No  | CD  | CD  | 12  | 8  | 3  | Fair                |
| 55   | Yes | Yes | Yes | Yes | No  | Yes | Yes | No  | Yes   | Yes | No | Yes | Yes | Yes | Yes | No | Yes | No  | Yes | Yes | 18  | 5  | 0  | Good                |
| 56   | Yes | Yes | Yes | Yes | No  | Yes | Yes | Yes | Yes   | Yes | No | Yes | No  | Yes | Yes | No | No  | Yes | Yes | Yes | 18  | 5  | 0  | Good                |
| 57   | Yes | No  | Yes | Yes | No  | Yes | No  | Yes | Yes   | CD  | No | Yes | No  | No  | No  | No | No  | No  | CD  | CD  | 10  | 10 | 3  | Fair                |

Note: AGREE II tool (Brouwers et al., 2010) checklist items for *methodological studies* related to quality in six domains: **A, B** and **C**. Scope and purpose; **D, E, F, G**. Stakeholder involvement; **H, I, J, K, L, M, N**. Rigor of development; **O, P, Q, R**. Clarity of presentation; **S, T, U**. Applicability; **V, W**. Editorial independence. CD=Cannot Determine. In the table, items C and D, and J, K and L have been aggregated because all studies received the same evaluation.

§ Rating: Good = 16–23 yes, Fair = 8–15 yes, or Poor = 0–7 yes.
